WITHDRAWN ARTICLE

## WITHDRAWN: Associations of polymorphisms in CTLA-4 and IL-18 with liver diseases: evidence from a meta-analysis

Shenglong Zhang, Xianwei Yang, Wentao Wang

*Bioscience Reports* (2020) BSR20193518; **DOI:** 10.1042/BSR20193518

The Accepted Manuscript version of this article (published on 23 December 2019) was withdrawn on 7 July 2020 due to concerns over data validity.
